# Supplementary material for: Differential brain effects of laser and needle acupuncture at LR8 using functional MRI
Source: PubMed Central journal article supplement — Acupunct Med. 2013 Aug 6;31(3):282–9. doi: 10.1136/acupmed-2012-010297 (PMC3786613; doi:10.1136/acupmed-2012-010297), 2013-08-06
Supplement: acupmed-2012-010297-s1.pdf [file acupmed-2012-010297-s1.pdf]

## APPENDIX

| NEEDLE  |             |          |      |       |      |      |      |        |      |      |       |
|---------|-------------|----------|------|-------|------|------|------|--------|------|------|-------|
| Subject | light touch | pressure | full | heavy | ache | sore | numb | tingle | warm | pain | other |
| 1 L     | *           | *        | *    |       | *    | *    |      |        | *    | *    |       |
| 2 R     | *           | *        |      |       |      |      |      |        |      |      |       |
| 3 R     |             | *        |      |       |      |      |      | *      |      |      |       |
| 4 L     | *           | *        |      |       |      |      |      |        |      |      |       |
| 5 L     | *           |          |      |       | *    |      |      |        |      |      |       |
| 6 L     |             |          |      |       | *    |      |      |        |      |      |       |
| 7 R     | *           |          |      |       |      |      |      |        | *    |      |       |
| 8 R     |             |          |      |       |      | *    |      |        |      |      |       |
| 9 L     |             |          |      |       |      |      |      | *      |      |      |       |
| 10 R    | *           | *        |      |       |      |      |      | *      | *    | *    |       |
| 11 R    |             |          |      |       |      | *    |      |        |      |      |       |
| 12 L    |             |          |      | *     | *    |      |      |        |      |      |       |
| 13 L    |             |          |      |       | *    |      |      | *      |      |      |       |
| 14 R    |             | *        |      |       |      | *    | *    | *      |      | *    |       |
| 15 L    |             | *        |      |       |      |      |      | *      |      |      |       |
| 16 L    |             |          |      |       |      |      |      | *      | *    |      |       |

**Supplementary Table 1.** Needle acupuncture at LR8 produced sensations: pressure and tingling > light touch > ache. R= right sided. L=left sided.

| LASER   |             |          |      |       |      |      |      |        |      |      |       |
|---------|-------------|----------|------|-------|------|------|------|--------|------|------|-------|
| Subject | light touch | pressure | full | heavy | ache | sore | numb | tingle | warm | pain | other |
| 1 R     | *           | *        |      |       |      |      |      | *      |      |      |       |
| 2 L     | *           |          |      |       |      |      |      |        |      |      |       |
| 3 L     | *           |          |      |       |      |      |      |        |      |      |       |
| 4 R     | *           |          |      |       |      |      |      |        |      |      |       |
| 5 R     | *           |          |      |       |      |      |      |        |      |      |       |
| 6 R     | *           |          |      |       |      |      |      | *      |      |      |       |
| 7 L     | *           |          |      |       |      |      |      |        |      |      |       |
| 8 L     | *           |          |      |       |      |      |      | *      |      |      |       |
| 9 R     | *           |          |      |       |      |      |      |        |      |      |       |
| 10 L    | *           |          |      |       |      |      |      | *      | *    |      |       |
| 11 L    | *           |          |      |       |      |      |      |        |      |      |       |
| 12 R    | *           |          |      |       |      |      |      |        |      |      |       |
| 13 R    | *           |          |      |       |      |      |      |        |      |      |       |
| 14 L    | *           |          |      |       |      |      |      |        |      |      |       |
| 15 R    | *           |          |      |       |      |      |      |        |      |      |       |
| 16 R    | *           |          |      |       |      |      |      |        | *    |      |       |

**Supplementary Table 2.**

Laser acupuncture at LR8 was felt as: light touch > tingle > pressure.

The predominant sensation was the laser probe causing light touch.

R=Right sided. L=Left sided.

|         | Laser | Laser | Laser       | Laser        | Laser | Laser  | Needle | Needle | MRI        | MRI     |
|---------|-------|-------|-------------|--------------|-------|--------|--------|--------|------------|---------|
| Subject | Dizzy | Aches | Tired (hrs) | Tired (days) | Vague | Nausea | Pain   | Unwell | Discomfort | Anxiety |
| 1       | 0     | 0     | 0           | 0            | 0     | 0      | 3      | 0      | 1          | 0       |
| 2       | 0     | 0     | 2           | 0            | 0     | 0      | 0      | 0      | 0          | 3       |
| 3       | 0     | 0     | 0           | 0            | 0     | 0      | 0      | 0      | 0          | 0       |
| 4       | 0     | 0     | 0           | 0            | 0     | 0      | 0      | 0      | 0          | 0       |
| 5       | 0     | 0     | 0           | 0            | 0     | 0      | 0      | 0      | 0          | 0       |
| 6       | 0     | 0     | 0           | 0            | 0     | 0      | 0      | 0      | 1          | 0       |
| 7       | 0     | 0     | 0           | 0            | 0     | 0      | 0      | 0      | 0          | 0       |
| 8       | 0     | 1     | 1           | 0            | 1     | 0      | 1      | 0      | 1          | 0       |
| 9       | 0     | 0     | 0           | 0            | 0     | 0      | 0      | 0      | 1          | 0       |
| 10      | 0     | 0     | 0           | 0            | 0     | 1      | 2      | 1      | 0          | 0       |
| 11      | 4     | 4     | 4           | 0            | 2     | 1      | 1      | 1      | 0          | 0       |
| 12      | 0     | 1     | 1           | 0            | 1     | 0      | 0      | 0      | 0          | 1       |
| 13      | 0     | 0     | 0           | 0            | 0     | 0      | 1      | 0      | 1          | 1       |
| 14      | 0     | 0     | 0           | 0            | 0     | 0      | 0      | 0      | 0          | 0       |
| 15      | 1     | 0     | 0           | 0            | 0     | 0      | 0      | 0      | 1          | 1       |
| 16      | 1     | 0     | 0           | 0            | 1     | 1      | 0      | 0      | 1          | 1       |

**Supplementary Table 3** Adverse Effects from NA and LA during MRI scanner and acupuncture intervention. Each adverse symptom graded from 0 (none) to 6 (severe). Mean values were: Dizzy [0.38], Aches [0.38 ], Tiredness [0.50], Vague [0.31], Nausea [0.19] for laser acupuncture. Mean values for needle laser adverse effects were Pain [0.50], Unwell [0.13]. Mean values for the MRI experience were Discomfort [0.44], Anxiety [0.44].
